# Supplementary material
Source: PubMed Central journal article supplement (PMC4291396)
Supplement: AAC.04037-14_zac001153636so1.pdf [file AAC.04037-14_zac001153636so1.pdf]

Table S1. List of primers used

| <i>Generation of the vector plasmid containing a zeocin marker</i>        |                                                              |
|---------------------------------------------------------------------------|--------------------------------------------------------------|
| Zeo_ORF_F                                                                 | CAATAATATTGAAAAAGGAAGAGTATGGCCAAGTTGACCAGTGCCG               |
| Zeo_ORF_R                                                                 | CTTGGTCTGACAGTTAGTCCTGCTCCTCGGCCACGAAGTG                     |
| Zeo-pUC19_F                                                               | GCCGAGGAGCAGGACTAACTGTCAGACCAAGTTTACTC                       |
| Zeo-pUC19_R                                                               | GTCAACTTGGCCATACTCTTCCTTTTTCAATATTATTG                       |
| <i>Cloning of the histidine kinase gene (crrB) into the zeocin vector</i> |                                                              |
| MW_F_5Phos                                                                | /5Phos/GTAGATTATCACTTAGCGATGTTG                              |
| MW_R                                                                      | GAAATAACATTAAGTCCCAAAAGAGG                                   |
| MW_F                                                                      | GTAGATTATCACTTAGCGATGTTG                                     |
| pUC19_MW_GA_F                                                             | GTTTGCCTCTTTTGGGACTTAATGTTATTTTCGTTTTACAACGTCGTGACTGG        |
| pUC19_MW_GA_R                                                             | TATAAATAATTAATCAACATCGCTAAGTGATAATCTACGGTCATAGCTGTTTCCTGTGTG |
| <i>Identification of transformants containing the crrB plasmid</i>        |                                                              |
| Jct_Up_F                                                                  | CCTGATTCTGTGGATAACCGTATT                                     |
| Jct_Up_R                                                                  | TCAATTTGATGTCTTTTGACAGGT                                     |

Table S2. List of variants in UHKPC26 and UHKPC28.

| <b>HS11286<br/>chromosome<br/>position<br/>(NC_016845.1)</b> | <b>UHKPC26</b> | <b>UHKPC28</b> | <b>UHKPC24</b> | <b>HS11286</b> | <b>Annotation and Coding Change</b>      | <b>UHKPC45 Locus ID<br/>(ARVO01000000)</b> |
|--------------------------------------------------------------|----------------|----------------|----------------|----------------|------------------------------------------|--------------------------------------------|
| 142007                                                       | G              | A              | A              | A              | intergenic                               |                                            |
| 149924                                                       | C              | T              | C              | C              | wecA, G134E                              | H239_4615                                  |
| 222886                                                       | A              | G              | G              | G              | elongation factor Tu, synonymous         |                                            |
| 222901                                                       | G              | G              | A              | A              | elongation factor Tu, synonymous         |                                            |
| 271699                                                       | T              | C              | C              | C              | B12-dependent methionine synthase, R388C | H239_3165                                  |
| 511727                                                       | -              | G              | T              | T              | intergenic                               |                                            |
| 511728                                                       | -              | T              | A              | A              | intergenic                               |                                            |
| 563331                                                       | G              | A              | G              | G              | intergenic                               |                                            |
| 563332                                                       | G              | C              | G              | G              | intergenic                               |                                            |
| 563334                                                       | A              | T              | A              | A              | intergenic                               |                                            |
| 564260                                                       | A              | -              | T              | T              | intergenic                               |                                            |
| 564262                                                       | G              | -              | C              | C              | intergenic                               |                                            |
| 564263                                                       | T              | -              | C              | C              | intergenic                               |                                            |
| 794047                                                       | C              | G              | C              | C              | carbamoyl phosphate synthase, synonymous |                                            |
| 1079903                                                      | G              | -              | T              | T              | intergenic                               |                                            |
| 1079904                                                      | C              | -              | A              | A              | intergenic                               |                                            |
| 1598180                                                      | G              | A              | G              | G              | PTS system component, synonymous         | H239_4498                                  |
| 1664898                                                      | A              | T              | A              | A              | modC, molybdate ABC transporter, L122Q   | H239_5401                                  |
| 1763270                                                      | -              | G              | C              | C              | intergenic                               |                                            |
| 1763271                                                      | -              | T              | A              | A              | intergenic                               |                                            |
| 1951755                                                      | T              | G              | G              | G              | intergenic                               |                                            |
| 1951757                                                      | T              | A              | A              | A              | intergenic                               |                                            |
| 1951758                                                      | T              | A              | A              | A              | intergenic                               |                                            |
| 1951759                                                      | T              | C              | C              | C              | intergenic                               |                                            |
| 2459665                                                      | T              | A              | T              | T              | rstA, F166Y                              | H239_2647                                  |
| 2550287                                                      | A              | G              | G              | G              | intergenic                               |                                            |
| 3034509                                                      | C              | -              | T              | T              | intergenic                               |                                            |
| 3036517                                                      | T              | A              | T              | T              | crrB, histidine kinase Q10L              | H239_3060                                  |
| 3036768                                                      | T              | G              | G              | G              | crrB, histidine kinase L94M              | H239_3060                                  |
| 3523324                                                      | T              | C              | C              | C              | hypothetical protein, R26C               | H239_1772                                  |
| 3704358                                                      | T              | G              | T              | T              | ABC transporter, YejF, synonymous        |                                            |
| 3761458                                                      | A              | A              | G              | G              | naphthoate synthase, A244T               | H239_1308                                  |
